MAY 2015 | VOLUME 172 | NUMBER 5

# The American Journal of Psychiatry

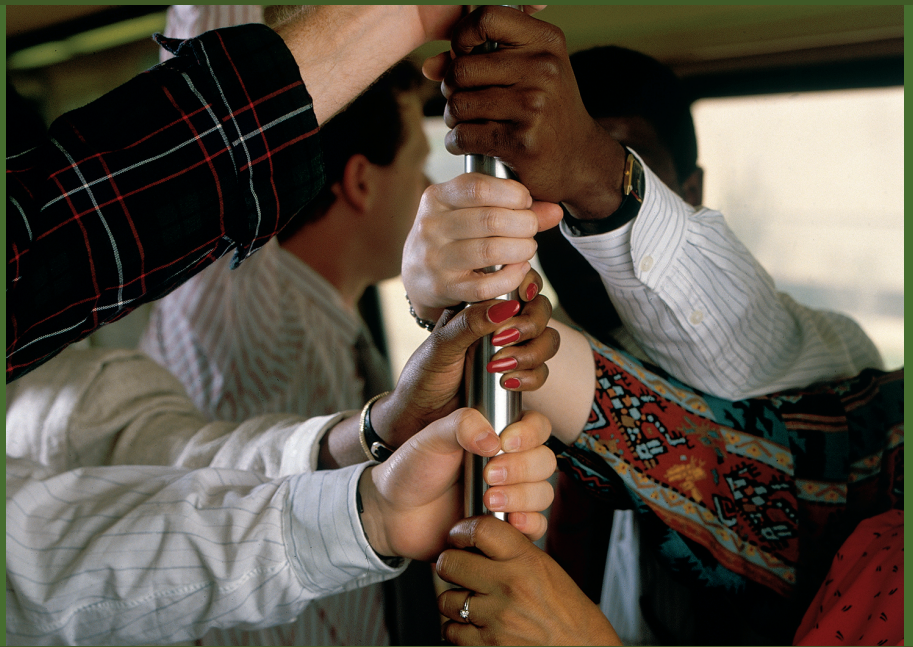

Reflections on Ferguson

Is Exposure Necessary? A Randomized Clinical Trial of  
Interpersonal Psychotherapy for PTSD

Brief Cognitive-Behavioral Therapy Effects on Post-Treatment  
Suicide Attempts in a Military Sample

Treatment of Maternal Depression in a Medication  
Clinical Trial and Its Effect on Children

Official Journal of the American Psychiatric Association  
[ajp.psychiatryonline.org](http://ajp.psychiatryonline.org)
