## PERSPECTIVAS

### EDITORIALES

- 403 Mejorando las Relaciones en las Víctimas de Trauma: El Caso de la Psicoterapia Intepersonal y el TEPT**  
*Peter Roy-Byrne, M.D.*
- 406 Buenas noticias en la batalla contra el suicidio militar**  
*John F. Curry, Ph.D.* **AUDIO**
- 408 Efectos en los niños del tratamiento para la depresión de la madre**  
*Mary Jo Coiro, Ph.D.*
- 410 Síntomas neuropsiquiátricos en la demencia – ¿Una causa o consecuencia?**  
*Anton P. Porsteinsson, M.D., Inga M. Antonsdottir, B.S.*

### COMENTARIO

- 412 Tres vías para el descubrimiento de medicamentos en psiquiatría**  
*Michael Berk, M.D., Ph.D., Andrew A. Nierenberg, M.D.*

### TRATAMIENTO EN PSIQUIATRÍA

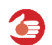

- 415 Trastorno de personalidad narcisista: Retos diagnósticos y clínicos**  
*Eve Caligor, M.D., et al.* **AUDIO**

### INTROSPECCIÓN

- 423 Reflexiones sobre Ferguson**  
*Racquel Reid, M.D.*

### IMÁGENES EN PSIQUIATRÍA

- 425 Una ojeada desde 2.000 yardas**  
*Jason I. Dailey, M.D., Christopher H. Warner, M.D.*

### RESÚMENES Y RESEÑAS

- 426 El descubrimiento clínico de la imipramina**  
*Walter A. Brown, M.D., Maria Rosdolsky, M.D.*

## NUEVAS INVESTIGACIONES

### ARTÍCULOS

- 430 ¿Es necesaria la exposición? Un ensayo clínico aleatorizado de psicoterapia interpersonal para el TEPT**  
*John C. Markowitz, M.D., et al.* **EDITORIAL • AUDIO • VIDEO**
- 441 Efectos de la terapia cognitivo-conductual breve en los intentos de suicidio post-tratamiento en una muestra militar: Resultados de un ensayo clínico aleatorizado con seguimiento de 2 años**  
*M. David Rudd, Ph.D., et al.* **EDITORIAL • CME • AUDIO**
- 450 Tratamiento de la depresión materna en un ensayo clínico de medicación y sus efectos en los niños**  
*Myrna M. Weissman, Ph.D., et al.* **EDITORIAL • AUDIO**

- 460 **Síntomas neuropsiquiátricos como predictores de la progresión hacia la demencia de Alzheimer severa y la muerte: El Estudio del Condado de Cache de la Progresión de la Demencia**  
Matthew E. Peters, M.D., et al. EDITORIAL • CME
- 466 **Fuentes y subcomponentes genéticos del potencial relacionado con eventos en la dimensión de psicosis analizada desde el estudio B-SNIP**  
Balaji Narayanan, Ph.D., et al.
- 479 **Morfología cortical en niños de entre 6 y 10 años con rasgos autistas – Un estudio de neuroimágenes basado en la población**  
Laura M.E. Blanken, M.D., M.Sc., et al. CME • AUDIO • VIDEO

## COMUNICADOS Y ACTUALIZACIONES

### CARTAS AL EDITOR

- 487 **Aumento de clozapina con TEC: Observaciones desde India**  
Sandeep Grover, M.D., et al.
- 487 **Abuso y diversión de gabapentina entre consumidores de opiáceos sin prescripción médica en la región apalache de Kentucky**  
Rachel V. Smith, M.P.H., et al.
- 488 [Correction]

### RESEÑAS BIBLIOGRÁFICAS

- 489 **“Reductores de cabezas” (shrinks): La historia no contada de la psiquiatría**  
Robert Freedman, M.D.
- 490 **Atención de miembros del servicio militar, veteranos y sus familias**  
Brian Martis, M.D.
- 491 **Criaturas de un día: Y otros cuentos de psicoterapia**  
Ira Steinman, M.D.
- 492 **Guía de estudio para el DSM-5**  
Misty Richards, M.D., M.S.
- 494 **Libros Recibidos**

## OTROS TEMAS DE INTERÉS

### 495 Educación Médica Continuada

**Cubierta:** [In this issue, Racquel Reid, M.D., shares her “Reflections on Ferguson” (p. 423) to remind all of us of the legacy of racism that affects our patients. She completed general residency training at Morehouse and is now a child and adolescent psychiatry fellow at the University of Texas Health Science Center San Antonio. Her companion piece directed to her colleagues in training will appear in the June issue of *The Residents’ Journal* ([http://ajp.psychiatryonline.org/residents\\_journal](http://ajp.psychiatryonline.org/residents_journal)).]

Article content that addresses **Core Competencies**, defined by the Accreditation Council of Graduate Medical Education and the American Board of Medical Specialties, is indicated by the following symbols:

-  Professionalism
-  Patient Care and Procedural Skills
-  Medical Knowledge
-  Practice-Based Learning and Improvement
-  Interpersonal and Communication Skills
-  Systems-Based Practice.

More information is available at [www.abms.org/maintenance\\_of\\_certification/MOC\\_competencies.aspx](http://www.abms.org/maintenance_of_certification/MOC_competencies.aspx)

- AUDIO** Highlighted in AJP Audio, a downloadable .mp3 file available at [ajp.psychiatryonline.org](http://ajp.psychiatryonline.org)
- CME** A course covering the content of this article is available online for paid subscribers to the AJP CME Course program
- EDITORIAL** Discussed in one of the issue’s editorials
- VIDEO** Highlighted online by Deputy Editor Daniel S. Pine, M.D.

### La Tabla de Contenidos y resúmenes de Este Número Está Disponible en Español

(This issue’s Table of Contents and abstracts are available in Spanish)

Translation presented in collaboration with the Office of Global Health, Rutgers-Robert Wood Johnson Medical School

Support for this effort provided by ACTA Colombia.

#### Translation courtesy of

**Sergi Casals, M.A.**, Garuna, Medellín, Colombia ([www.garunaeditors.com](http://www.garunaeditors.com))

**Carlos Lopez Jaramillo, M.D.**, Universidad de Antioquia, Medellín, Colombia

**Javier I. Escobar, M.D., M.Sc.**, Rutgers-Robert Wood Johnson Medical School

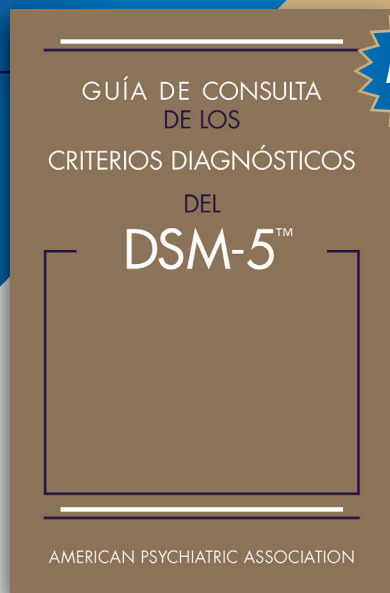

**Nuevo!**

## Guía de consulta de los criterios diagnósticos del DSM-5™

**Spanish Edition of the Desk Reference to the Diagnostic Criteria From DSM-5™**

American Psychiatric Association

La Guía de consulta de los criterios diagnósticos del DSM-5™ es una ayuda concisa y asequible para la referencia psiquiátrica fundamental, el DSM-5™. Incluye la clasificación diagnóstica completa revisada, así como todos los criterios diagnósticos del DSM-5™ en un formato fácil de utilizar. Esta cómoda referencia proporciona un acceso rápido a la información esencial para emitir un diagnóstico. Diseñado como complemento del DSM-5™, esta cómoda guía ayudará a los profesionales de la salud mental a incorporar los criterios diagnósticos del DSM-5™ en sus diagnósticos.

El Manual diagnóstico y estadístico de los trastornos mentales es la máxima referencia autorizada para la práctica clínica en el campo de la salud mental. Los cambios estructurales y diagnósticos de la quinta edición son un material que todos los clínicos "deben conocer". La Guía de consulta de los criterios diagnósticos del DSM-5™ condensa la información diagnóstica actualizada esencial de este manual para ofrecer a los clínicos un recurso inestimable para diagnosticar con eficacia los trastornos mentales, desde el de mayor prevalencia al menos frecuente.

2014 • 490 pages • ISBN 978-0-89042-551-0 • Paperback • \$69.00 • Item #2551

*También disponible en Español*

### Aplicación para celular de los Criterios Diagnósticos del DSM-5™

La Aplicación Móvil de Criterios Diagnósticos DSM-5™ proporciona a los profesionales, investigadores y estudiantes de la salud mental un rápido acceso a códigos y criterios vitales de DSM para que puedan integrar por completo los nuevos datos en su práctica y sus estudios. Los usuarios tienen acceso completo fuera de línea a todos los conjuntos de criterios, además de acceso en línea a vídeos, comentarios y recursos de apoyo. Sus poderosas herramientas de personalización y de búsqueda ayudan y mejoran la valoración de las presentaciones de los síntomas en diversos entornos clínicos y administrativos.

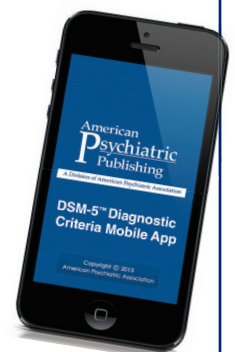

Ahora disponible para dispositivos iOS y Android.

## El descubrimiento clínico de la imipramina

Walter A. Brown, M.D., Maria Rosdolsky, M.D.

Las principales clases de medicamentos psicotrópicos surgieron en una década extraordinaria de descubrimientos entre finales de los años 1940 y finales de los 1950. En el clima actual de pesimismo acerca del desarrollo de nuevos medicamentos, puede ser instructivo devolver la mirada hacia los métodos de investigación que se utilizaron durante esa era. Un ejemplo es el estudio que permitió identificar los anti-depresivos. Lo realizó Roland Kuhn, un psiquiatra suizo que trabajaba en un hospital psiquiátrico remoto. Kuhn, como los otros investigadores pioneros de su época, tuvo acceso a medicamentos nuevos, y el método que utilizó para descubrir sus efectos clínicos fue la observación clínica abierta, exploratoria y exhaustiva. El artículo en el que se reportaron los resultados de su estudio no se ha publicado en inglés, pero por su importancia histórica y por el hecho de que el logro de Kuhn sea un contraste tan grande con el momento actual, en el que el desarrollo de medicamentos parece estar en un punto muerto, los autores pensaron que podría ser informa-

tivo leer acerca de su descubrimiento en sus propias palabras. Por este motivo, la co-autora de este trabajo (M.R) tradujo el artículo al inglés y los autores presentan ahora fragmentos de la traducción con el fin de estimular la reevaluación de los enfoques contemporáneos para el desarrollo de medicamentos.

Según los criterios de investigación actuales, el método de Kuhn de observación clínica exploratoria y sin restricciones no cumplía los requisitos mínimos de calidad y era aleatorio e incluso desordenado. Sin embargo, representó un gran avance—el descubrimiento de que un medicamento puede aliviar la depresión—que ha repercutido de manera duradera en el tratamiento de la depresión y en el desarrollo de medicamentos antidepresivos. La experiencia de Kuhn puede ser útil para nuestras estrategias de desarrollo de medicamentos.

*(Am J Psychiatry 2015; 172:426–429)*

## ¿Es necesaria la exposición? Un ensayo clínico aleatorizado de psicoterapia interpersonal para el TEPT

John C. Markowitz, M.D.; Eva Petkova, Ph.D.; Yuval Neria, Ph.D.; Page E. Van Meter, Ph.D.; Yihong Zhao, Ph.D.; Elizabeth Hembree, Ph.D.; Karina Lovell, Ph.D.; Tatyana Biyanova, Ph.D.; Randall D. Marshall, M.D.

**Objetivo:** La exposición a los recordatorios del trauma se ha considerado imprescindible en psicoterapia para tratamiento del trastorno por estrés postraumático (TEPT). Los autores evaluaron la psicoterapia interpersonal (IPT), la que se ha demostrado tiene eficacia antidepressiva. Igualmente, en investigaciones piloto en TEPT, la IPT luce promisorio como tratamiento no basado en exposición y sin relación con la terapia cognitivo-conductual.

**Método:** Los autores realizaron un ensayo aleatorizado de 14 semanas en el que compararon la IPT, la exposición prolongada (un ejemplo basado en la exposición) y la terapia de relajación (una psicoterapia activa de control) en 110 pacientes no medicados que tenían TEPT crónico y un puntaje de >50 en la escala CAPS (Escala de TEPT administrada por el clínico). Se estratificó la aleatorización según la presencia o ausencia de depresión mayor comórbida. La hipótesis de los autores fue que la IPT sería sólo mínimamente inferior (una diferencia de <12,5 puntos en el puntaje CAPS) a la exposición prolongada.

**Resultados:** El tamaño de efecto intra-grupo fue grande para todas las terapias (valores  $d$ , 1,32-1,88). Las tasas de respuesta, definida como una mejora del >30% en el puntaje CAPS, fuer-

on 63% para la IPT, 47% para la exposición prolongada y 38% para la terapia de relajación (sin diferencias significativas entre los grupos). La diferencia (no significativa) entre los resultados de la escala CAPS para la IPT y para la exposición prolongada fue de 5,5 puntos y se rechazó la hipótesis nula de inferioridad más que mínima de la IPT ( $p=0,035$ ). Los pacientes con depresión mayor comórbida fueron nueve veces más propensos a abandonar la terapia de exposición prolongada. La calidad de vida y el funcionamiento social mejoraron más con la IPT y la exposición prolongada que con la terapia de relajación.

**Conclusiones:** Este estudio demostró la no inferioridad de la IPT para el TEPT, en comparación con el tratamiento de referencia (patrón de oro). La IPT tuvo tasas de deserción inferiores y tasas de respuesta superiores a la exposición prolongada. A diferencia de lo que se suele creer en la práctica clínica, el tratamiento para el TEPT puede no requerir exposición cognitivo-conductual a recordatorios del trauma. Además, los pacientes con depresión mayor comórbida pueden beneficiarse más de la IPT que de la exposición prolongada.

(*Am J Psychiatry* 2015; 172:430-440)

## Efectos de la terapia cognitivo-conductual breve en los intentos de suicidio post-tratamiento en una muestra militar: Resultados de un ensayo clínico aleatorizado con seguimiento de 2 años

M. David Rudd, Ph.D., A.B.P.P.; Craig J. Bryan, Psy.D., A.B.P.P.; Evelyn G. Wertenberger, Ph.D., L.C.S.W.; Alan L. Peterson, Ph.D., A.B.P.P.; Stacey Young-McCaughan, R.N., Ph.D.; Jim Mintz, Ph.D.; Sean R. Williams, L.C.S.W.; Kimberly A. Arne, L.C.S.W.; Jill Breitbach, Psy.D., A.B.P.P.; Kenneth Delano, Ph.D.; Erin Wilkinson, Psy.D.; Travis O. Bruce, M.D.

**Objetivo:** Los autores evaluaron la efectividad de la terapia cognitivo-conductual (TCC) breve para la prevención de los intentos de suicidio en personal militar.

**Método:** En un ensayo controlado aleatorizado, soldados activos del ejército en Fort Cason, Colorado, que habían cometido un intento de suicidio o habían tenido ideación suicida con intención de morir, fueron asignados aleatoriamente al tratamiento habitual (N=76) o al tratamiento habitual más TCC breve (N=76). Se evaluó la incidencia de los intentos de suicidio durante el período de seguimiento con la Entrevista de Intento de Suicidio y Autolesiones (Suicide Attempt Self-Injury Interview, SASII). Los criterios de inclusión fueron la presencia de ideación suicida con intención de morir durante la semana anterior y/o intento de suicidio en el mes anterior. Se excluyó a los soldados que tenían alguna enfermedad médica o mental como psicosis activa o manía, que les impidiera firmar el consentimiento informado o participar en el tratamiento de consulta externa. Para determinar la eficacia del tratamiento con respecto a la incidencia y al tiempo hasta el intento de suicidio, se realizaron análisis de curva. Las dife-

rencias en los síntomas psiquiátricos se evaluaron usando modelos longitudinales de efectos aleatorios.

**Resultados:** Desde el inicio del estudio hasta la evaluación del seguimiento de 24 meses, ocho participantes en TCC breve (13,8%) y 18 participantes en tratamiento habitual (40,2%) hicieron por lo menos un intento de suicidio (cociente de riesgo=0,38, IC=0,16–0,87, número necesario para tratar=3,88), lo que sugiere que los soldados en TCC breve fueron aproximadamente un 60% menos propensos a realizar un intento de suicidio durante el seguimiento en comparación con los soldados en tratamiento habitual. No hubo diferencias entre grupos en cuanto a la severidad de los síntomas psiquiátricos.

**Conclusiones:** La TCC breve fue efectiva para prevenir intentos de suicidio durante el seguimiento en miembros activos del servicio militar que tenían ideación suicida en ese momento o que habían cometido un intento de suicidio recientemente.

(*Am J Psychiatry* 2015; 172:441–449)

## Tratamiento de la depresión materna en un ensayo clínico de medicación y sus efectos en los niños

Myrna M. Weissman, Ph.D.; Priya Wickramaratne, Ph.D.; Daniel J. Pilowsky, M.D., M.P.H.; Ernest Poh, M.S.; Lisa A. Batten, Ph.D.; Mariely Hernandez, M.A.; Martine F. Flament, M.D., Ph.D.; Jessica A. Stewart, M.D.; Patrick McGrath, M.D.; Pierre Blier, M.D., Ph.D.; Jonathan W. Stewart, M.D.

**Objetivo:** Los estudios observacionales demuestran que cuando los síntomas de una madre depresiva remiten, los síntomas psiquiátricos de sus hijos disminuyen. El objetivo de los autores fue, a partir de la asignación aleatoria de tratamientos, determinar los efectos diferenciales que el tratamiento de una madre depresiva tiene en su hijo.

**Método:** El estudio fue un ensayo aleatorizado y doble ciego con escitalopram, bupropión o la combinación de ambos, en madres deprimidas (N=76) e independientemente se evaluó a sus hijos (N=135; edades 7-17 años).

**Resultados:** No hubo diferencias significativas derivadas del tratamiento en los síntomas depresivos o la remisión de las madres. Los síntomas depresivos y el funcionamiento de los hijos mejoraron de manera significativa en los niños cuyas madres estaban en el grupo de escitalopram (comparados con los niños cuyas madres estaban en el grupo de bupropión o en el de la combinación de ambos medicamentos). El grupo de escitalopram fue el único en el que se estableció una asociación entre la mejora de la depresión de la madre y la mejora en los síntomas del hijo. Los análisis exploratorios sugirieron que dicha asociación puede ser debida a cambios en el

funcionamiento parental: Las madres en el grupo de escitalopram reportaron una mejora significativamente mayor, en relación a los otros grupos, de su capacidad de escuchar y hablar con sus hijos, que como grupo reportaron que sus madres fueron más cariñosas durante las 12 semanas. Parece que la afectividad negativa materna al inicio del estudio moderó el efecto que el tratamiento materno tuvo en los hijos, aunque dicho efecto no fue significativo estadísticamente. Los hijos de las madres con afectividad negativa baja mejoraron en todos los grupos de tratamiento. Los hijos de madres con afectividad negativa alta mejoraron significativamente sólo en el caso de las madres que estaban en el grupo de escitalopram.

**Conclusiones:** Los efectos de la mejoría de las madres deprimidas en sus hijos puede depender del tipo de tratamiento que éstas reciben. Las madres depresivas con malestar ansioso (anxious distress) e irritabilidad altos pueden necesitar medicamentos que reduzcan estos síntomas para poder mostrar el efecto que su remisión tiene en sus hijos.

*(Am J Psychiatry 2015; 172:450–459)*

# Síntomas neuropsiquiátricos como predictores de la progresión hacia la demencia de Alzheimer severa y la muerte: El Estudio del Condado de Cache de la Progresión de la Demencia

Matthew E. Peters, M.D.; Sarah Schwartz, M.S.; Dingfen Han, Ph.D.; Peter V. Rabins, M.D.; Martin Steinberg, M.D.; Joann T. Tschanz, Ph.D.; Constantine G. Lyketsos, M.D., M.H.S.

**Objetivo:** El conocimiento sobre los factores que influyen en la tasa de progresión de la demencia de Alzheimer es limitado. A partir de datos del Estudio del Condado de Cache de la Progresión de la Demencia, los autores examinaron la relación entre los síntomas neuropsiquiátricos clínicamente significativos en la demencia de Alzheimer leve y la progresión hacia la demencia severa o la muerte.

**Método:** El Estudio del Condado de Cache de la Progresión de la Demencia es un estudio longitudinal de la progresión de la demencia en casos incidentes de esta enfermedad. Los análisis de supervivencia incluyeron gráficos no ajustados de Kaplan-Meier y modelos de riesgo de Cox, proporcionales y multivariados. Con las estimaciones de cociente de riesgos se controló la edad al inicio de la demencia, la duración de la demencia al inicio del estudio, el género, el nivel de escolaridad, el nivel de salud médica general, y el genotipo de la apolipoproteína E épsilon 4.

**Resultados:** Se estudiaron 335 pacientes con demencia de Alzheimer incidente. Sesenta y ocho (el 20%) desarrollaron demencia severa durante el período de seguimiento. La psi-

cosis (cociente de riesgo=2,007), la agitación/agresión (cociente de riesgo=2,946) y cada uno de los síntomas neuropsiquiátricos clínicamente significativos (puntuación de dominio  $\geq 4$ , cociente de riesgo=2,682) se asociaron con una progresión más rápida hacia la demencia severa. La psicosis (cociente de riesgo=1,537), los síntomas afectivos (cociente de riesgo=1,510), la agitación/agresión (cociente de riesgo=1,942), los síntomas neuropsiquiátricos ligeramente sintomáticos (puntuación de dominio de 1–3, cociente de riesgo=1,448) y los síntomas neuropsiquiátricos clínicamente significativos (cociente de riesgo=1,951) se asociaron con la muerte temprana.

**Conclusiones:** Ciertos síntomas neuropsiquiátricos específicos están asociados con menor tiempo de supervivencia desde la demencia de Alzheimer leve hasta la demencia severa y/o la muerte. Debería examinarse el tratamiento de síntomas neuropsiquiátricos específicos en la demencia de Alzheimer leve para investigar su potencial de retrasar el tiempo hasta la demencia severa o la muerte.

(*Am J Psychiatry* 2015; 172:460–465)



## Fuentes y subcomponentes genéticos del potencial relacionado con eventos en la dimensión de psicosis analizada desde el estudio B-SNIP

Balaji Narayanan, Ph.D.; Lauren E. Ethridge, Ph.D.; Kasey O'Neil, B.S.; Sabra Dunn, B.S.; Ian Mathew, B.S.; Neeraj Tandon, B.S.; Vince D. Calhoun, Ph.D.; Gualberto Ruaño, M.D., Ph.D.; Mohan Kocherla, M.S.; Andreas Windemuth, Ph.D.; Brett A. Clementz, Ph.D.; Carol A. Tamminga, M.D.; John A. Sweeney, Ph.D.; Matcheri S. Keshavan, M.D.; Godfrey D. Pearson, M.D.

**Objetivo:** Se tiene poco conocimiento de los factores de riesgo biológicos que subyacen a la psicosis. Los fundamentos biológicos de la dimensión de psicosis se pueden derivar utilizando asociaciones genéticas con fenotipos intermedios como subcomponentes de los potenciales auditivos relacionados con eventos (PRE). Varias anomalías de los subcomponentes de los PRE en esquizofrenia y trastorno bipolar psicótico son heredables y se encuentra su expresión en familiares no afectados, aunque sólo en un limitado número de estudios se investigan las contribuciones genéticas a las anomalías de los PRE. Los autores emplearon un novedoso análisis de componentes independientes paralelo (para-ICA) para determinar qué clústers de genes derivados empíricamente están asociados con subcomponentes de PRE basados en datos, pensando que una etiología compleja subyace a la psicosis.

**Método:** Los autores examinaron la asociación poligénica multivariada de los subcomponentes de los PRE a partir de datos de 64 canales del paradigma auditivo 'odd-ball' en 144 individuos con esquizofrenia, 210 casos con trastorno bipolar psicótico y 95 individuos sanos del estudio B-SNIP (Bipolar-Schizophrenia Network on Intermediate Phenotypes, Red bipolar-esquizofrenia en los fenotipos intermedios). Los datos se redujeron, con el análisis de componentes principales, a dos ondas "diana" y una onda estándar de los PRE. La asociación multivariada de ondas comprimidas de los PRE con

una serie de 20.329 polimorfismos de nucleótido simple (SNPs) (reducidos de un conjunto de 1 millón de SMPs) se examinó utilizando para-ICA: Los genes asociados con SNPs se examinaron con mayor detalle utilizando herramientas de análisis de rutas.

**Resultados:** Con el análisis para-ICA se identificaron cuatro componentes de los PRE, que estaban correlacionados de forma significativa con tres componentes genéticos. El análisis de enriquecimiento reveló la vía de respuesta del complemento inmune y múltiples procesos que median de manera significativa las anomalías de los PRE en la psicosis, incluyendo la adhesión celular sináptica, la guía de los axones, y la neurogénesis.

**Conclusiones:** Este estudio permitió identificar tres componentes genéticos que incluyen múltiples genes que median las anomalías de los subcomponentes de los PRE en esquizofrenia y en trastorno bipolar psicótico. Los datos sugieren una posible estructura poligénica que influye en los procesos claves del neurodesarrollo, los circuitos neurales y la función cerebral que media las vías biológicas, y que es factible que estén asociados con la psicosis.

(*Am J Psychiatry* 2015; 172:466–478)

## Morfología cortical en niños de entre 6 y 10 años con rasgos autistas: Un estudio de neuroimágenes basado en la población

Laura M.E. Blanken, M.D., M.Sc.; Sabine E. Mous, M.Sc.; Akhgar Ghassabian, M.D., Ph.D.; Ryan L. Muetzel, M.Sc.; Nikita K. Schoemaker, M.Sc.; Hanan El Marroun, Ph.D.; Aad van der Lugt, M.D., Ph.D.; Vincent W.V. Jaddoe, M.D., Ph.D.; Albert Hofman, M.D., Ph.D.; Frank C. Verhulst, M.D., Ph.D.; Henning Tiemeier, M.D., Ph.D.; Tonya White, M.D., Ph.D.

**Objetivo:** La evidencia reciente sugiere que los síntomas de discapacidad social en los trastornos del espectro autista (TEA) forman un espectro que se extiende a la población general. Sin embargo, no está claro si la neuroanatomía de los TEA también muestra un continuum similar en la población general. Por este motivo, el objetivo del presente estudio fue investigar la relación entre la morfología cortical y los rasgos autistas en un continuum, en una muestra grande de niños basada en la población

**Método:** El estudio incluyó 717 niños de entre 6 y 10 años que participan en el Estudio generación R, una cohorte grande basada en la población. Los rasgos autistas se midieron con la Escala de Capacidad de Respuesta Social (Social Responsiveness Scale) cuando los niños tenían aproximadamente 6 años. Se obtuvieron RMN de alta resolución y se cuantificaron las medidas morfológicas del córtex en todo el cerebro, incluyendo el grosor cortical y el grado de circunvolución.

**Resultados:** Los niños con más rasgos autistas mostraron áreas extensas de circunvolución reducida. Después de excluir a los niños con los rasgos autistas más marcados y con TEA confirmado, la asociación siguió estando presente en una área amplia que implicaba el hemisferio temporal izquierdo y las regiones precuneales. Se observaron efectos comparables, aunque no significativos, al comparar una pequeña muestra de sujetos con TEA confirmado con controles apareados por edad y género.

**Conclusiones:** Se encontraron diferencias en la morfología cortical relacionadas con los rasgos autistas de un continuum en una muestra grande, basada en la población, de niños en edad escolar. Parte de estas diferencias persistieron después de excluir a los niños afectados con más severidad. Estos hallazgos apoyan una extensión de la neurobiología de los rasgos autistas a la población general.

*(Am J Psychiatry 2015; 172:479–486)*
